# Supplementary material for: MMPs and TIMPs Expression Levels in the Periodontal Ligament during Orthodontic Tooth Movement: A Systematic Review of In Vitro and In Vivo Studies
Source: MDPI journal article supplement (doi:10.3390/ijms22136967), 2021-06-28
Supplement: s1 [file s1]

# Supplementary Materials

*Systematic Review*

## **MMPs and TIMPs expression levels in the periodontal ligament during orthodontic tooth movement: a systematic review of in vitro and in vivo studies**

**Christian Behm <sup>1,2</sup>, Michael Nemec <sup>1</sup>, Fabian Weissinger <sup>2</sup>, Marco Aoqi Rausch <sup>1,2</sup>, Oleh Andrukhov <sup>1,\*</sup> and Erwin Jonke <sup>1</sup>**

<sup>1</sup> Clinical Division of Orthodontics, University Clinic of Dentistry, Sensengasse 2A, 1090 Vienna,  
christian.behm@meduniwien.ac.at, michael.nemec@meduniwien.ac.at, marco.rausch@meduniwien.ac.at, erwin.jonke@meduniwien.ac.at,

<sup>2</sup> Competence Centre for Periodontal Research, University Clinic of Dentistry, Sensengasse 2A, 1090 Vienna,  
fabianweissinger95@gmx.at, oleh.andrukhov@meduniwien.ac.at,

\* Correspondence: oleh.andrukhov@meduniwien.ac.at

**Table S1.** Risk of Bias Assessment. Reporting quality of all included *in vitro* studies (adapted from Samuel et al. 2016).

| Author                  | Year | Description of scientific background | Description of objectives | Justification for model | Study design description | Defined experimental outcomes | Ethical statement | Cell maintenance condition | Description of measurement precision and variability | Statistical analyse |
|-------------------------|------|--------------------------------------|---------------------------|-------------------------|--------------------------|-------------------------------|-------------------|----------------------------|------------------------------------------------------|---------------------|
| Behm et al.             | 2021 | ✓                                    | ✓                         | ✓                       | ✓                        | ✓                             | ✓                 | ✓                          | X                                                    | ✓                   |
| Bolcato-Bellemin et al. | 2000 | ✓                                    | ✓                         | ✓                       | ✓                        | ✓                             | ✓                 | ✓                          | X                                                    | ✓                   |
| Chen et al.             | 2013 | ✓                                    | ✓                         | ✓                       | ✓                        | ✓                             | X                 | ✓                          | X                                                    | ✓                   |
| Fujihara et al.         | 2010 | ✓                                    | ✓                         | X                       | ✓                        | ✓                             | X                 | ✓                          | X                                                    | ✓                   |
| Grimm et al.            | 2020 | ✓                                    | ✓                         | X                       | ✓                        | ✓                             | ✓                 | ✓                          | X                                                    | ✓                   |
| Hacopian et al.         | 2011 | ✓                                    | ✓                         | ✓                       | ✓                        | ✓                             | ✓                 | ✓                          | X                                                    | ✓                   |
| Huang et al.            | 2008 | ✓                                    | ✓                         | ✓                       | ✓                        | ✓                             | ✓                 | ✓                          | X                                                    | ✓                   |
| Jacobs et al.           | 2014 | ✓                                    | ✓                         | ✓                       | ✓                        | ✓                             | X                 | ✓                          | X                                                    | ✓                   |
| Jacobs et al.           | 2018 | ✓                                    | ✓                         | ✓                       | X                        | ✓                             | ✓                 | ✓                          | X                                                    | ✓                   |
| Kook et al.             | 2011 | ✓                                    | ✓                         | ✓                       | ✓                        | ✓                             | ✓                 | ✓                          | X                                                    | ✓                   |
| Lisboa et al.           | 2009 | ✓                                    | ✓                         | ✓                       | ✓                        | ✓                             | ✓                 | ✓                          | X                                                    | ✓                   |
| Lisboa et al.           | 2013 | ✓                                    | ✓                         | X                       | ✓                        | ✓                             | ✓                 | ✓                          | X                                                    | ✓                   |
| Lisboa et al.           | 2013 | ✓                                    | ✓                         | X                       | ✓                        | ✓                             | ✓                 | ✓                          | X                                                    | X                   |
| Long et al.             | 2002 | ✓                                    | ✓                         | ✓                       | ✓                        | ✓                             | X                 | ✓                          | X                                                    | ✓                   |
| Ma et al.               | 2015 | ✓                                    | ✓                         | ✓                       | ✓                        | ✓                             | ✓                 | ✓                          | X                                                    | ✓                   |
| Narimiya et al.         | 2017 | ✓                                    | ✓                         | X                       | ✓                        | ✓                             | X                 | ✓                          | X                                                    | ✓                   |
| Nemoto et al.           | 2010 | ✓                                    | ✓                         | ✓                       | ✓                        | ✓                             | ✓                 | ✓                          | X                                                    | ✓                   |
| Nettelhoff et al.       | 2016 | ✓                                    | ✓                         | ✓                       | ✓                        | ✓                             | ✓                 | ✓                          | X                                                    | ✓                   |
| Proff et al.            | 2014 | ✓                                    | ✓                         | ✓                       | ✓                        | ✓                             | ✓                 | ✓                          | X                                                    | ✓                   |
| Redlich et al.          | 2004 | ✓                                    | ✓                         | ✓                       | ✓                        | ✓                             | X                 | ✓                          | X                                                    | ✓                   |
| Saminathan et al.       | 2012 | ✓                                    | ✓                         | ✓                       | ✓                        | ✓                             | ✓                 | ✓                          | X                                                    | ✓                   |
| Schröder et al.         | 2020 | ✓                                    | ✓                         | ✓                       | ✓                        | ✓                             | ✓                 | ✓                          | X                                                    | ✓                   |
| Tantilertanant et al.   | 2019 | ✓                                    | ✓                         | ✓                       | ✓                        | ✓                             | ✓                 | ✓                          | X                                                    | ✓                   |
| Tsuji et al.            | 2004 | ✓                                    | ✓                         | ✓                       | ✓                        | ✓                             | ✓                 | ✓                          | X                                                    | ✓                   |
| Wescott et al.          | 2007 | ✓                                    | ✓                         | ✓                       | ✓                        | ✓                             | ✓                 | ✓                          | X                                                    | ✓                   |
| Zheng et al.            | 2012 | ✓                                    | ✓                         | ✓                       | ✓                        | ✓                             | X                 | ✓                          | X                                                    | ✓                   |
| Zheng et al.            | 2019 | ✓                                    | ✓                         | ✓                       | ✓                        | ✓                             | ✓                 | ✓                          | X                                                    | ✓                   |
| Ziegler et al.          | 2010 | ✓                                    | ✓                         | ✓                       | ✓                        | ✓                             | ✓                 | ✓                          | X                                                    | ✓                   |

✓ Yes (lower bias risk); X No (higher bias risk)

**Table S2.** Risk of Bias Assessment. Methodological quality of all included *in vitro* studies (adapted from Samuel et al. 2016).

| Author                  | Year | Baseline characteristics similarity / appropriate control group selection | Complete outcome data | No selective outcome reporting | Sample size determination | Statistical analysis | Appropriate/ controlled exposure | Statement of conflict of interest/ funding source | Test system | Test treatment details |
|-------------------------|------|---------------------------------------------------------------------------|-----------------------|--------------------------------|---------------------------|----------------------|----------------------------------|---------------------------------------------------|-------------|------------------------|
| Behm et al.             | 2021 | ✓                                                                         | ✓                     | ✓                              | X                         | ✓                    | ✓                                | ✓                                                 | ✓           | ✓                      |
| Bolcato-Bellemin et al. | 2000 | ✓                                                                         | ✓                     | ✓                              | X                         | ✓                    | ✓                                | X                                                 | ✓           | ✓                      |
| Chen et al.             | 2013 | ✓                                                                         | ✓                     | ✓                              | X                         | ✓                    | ✓                                | X                                                 | ✓           | ✓                      |
| Fujihara et al.         | 2010 | ✓                                                                         | ✓                     | ✓                              | X                         | ✓                    | ✓                                | X                                                 | ✓           | ✓                      |
| Grimm et al.            | 2020 | ✓                                                                         | ✓                     | ✓                              | X                         | ✓                    | ✓                                | ✓                                                 | ✓           | ✓                      |
| Hacopian et al.         | 2011 | ✓                                                                         | ✓                     | ✓                              | X                         | ✓                    | ✓                                | X                                                 | ✓           | ✓                      |
| Huang et al.            | 2008 | ✓                                                                         | ✓                     | ✓                              | X                         | ✓                    | ✓                                | X                                                 | ✓           | ✓                      |
| Jacobs et al.           | 2014 | ✓                                                                         | ✓                     | ✓                              | X                         | ✓                    | ✓                                | ✓                                                 | ✓           | ✓                      |
| Jacobs et al.           | 2018 | ✓                                                                         | ✓                     | ✓                              | X                         | ✓                    | ✓                                | ✓                                                 | ✓           | ✓                      |
| Kook et al.             | 2011 | ✓                                                                         | ✓                     | ✓                              | X                         | ✓                    | ✓                                | ✓                                                 | ✓           | ✓                      |
| Lisboa et al.           | 2009 | ✓                                                                         | ✓                     | ✓                              | X                         | ✓                    | ✓                                | X                                                 | ✓           | ✓                      |
| Lisboa et al.           | 2013 | ✓                                                                         | ✓                     | ✓                              | X                         | ✓                    | ✓                                | ✓                                                 | ✓           | ✓                      |
| Lisboa et al.           | 2013 | ✓                                                                         | ✓                     | ✓                              | X                         | X                    | ✓                                | ✓                                                 | ✓           | ✓                      |
| Long et al.             | 2002 | ✓                                                                         | ✓                     | ✓                              | X                         | ✓                    | ✓                                | X                                                 | ✓           | ✓                      |
| Ma et al.               | 2015 | ✓                                                                         | ✓                     | ✓                              | X                         | ✓                    | ✓                                | ✓                                                 | ✓           | ✓                      |
| Narimiya et al.         | 2017 | ✓                                                                         | ✓                     | ✓                              | X                         | ✓                    | ✓                                | X                                                 | ✓           | ✓                      |
| Nemoto et al.           | 2010 | ✓                                                                         | ✓                     | ✓                              | X                         | ✓                    | ✓                                | ✓                                                 | ✓           | ✓                      |
| Nettelhoff et al.       | 2016 | ✓                                                                         | ✓                     | ✓                              | X                         | ✓                    | ✓                                | ✓                                                 | ✓           | ✓                      |
| Proff et al.            | 2014 | ✓                                                                         | ✓                     | ✓                              | X                         | ✓                    | ✓                                | ✓                                                 | ✓           | ✓                      |
| Redlich et al.          | 2004 | ✓                                                                         | ✓                     | ✓                              | X                         | ✓                    | ✓                                | X                                                 | ✓           | ✓                      |
| Saminathan et al.       | 2012 | ✓                                                                         | ✓                     | ✓                              | X                         | ✓                    | ✓                                | X                                                 | ✓           | ✓                      |
| Schröder et al.         | 2020 | ✓                                                                         | ✓                     | ✓                              | X                         | ✓                    | ✓                                | ✓                                                 | ✓           | ✓                      |
| Tantilertanant et al.   | 2019 | ✓                                                                         | ✓                     | ✓                              | X                         | ✓                    | ✓                                | ✓                                                 | ✓           | ✓                      |
| Tsuji et al.            | 2004 | ✓                                                                         | ✓                     | ✓                              | X                         | ✓                    | ✓                                | X                                                 | ✓           | ✓                      |
| Wescott et al.          | 2007 | ✓                                                                         | ✓                     | ✓                              | X                         | ✓                    | ✓                                | X                                                 | ✓           | ✓                      |
| Zheng et al.            | 2012 | ✓                                                                         | ✓                     | ✓                              | X                         | ✓                    | ✓                                | ✓                                                 | ✓           | ✓                      |
| Zheng et al.            | 2019 | ✓                                                                         | ✓                     | ✓                              | X                         | ✓                    | ✓                                | ✓                                                 | ✓           | ✓                      |
| Ziegler et al.          | 2010 | ✓                                                                         | ✓                     | ✓                              | X                         | ✓                    | ✓                                | X                                                 | ✓           | ✓                      |

✓ Yes (lower bias risk); X No (higher bias risk)

**Table S3:** Risk of Bias Assessment of all included *in vivo* studies (adapted from The Joanna Briggs Institute Critical Appraisal Checklist for analytical cross-sectional study)

| Authors           | Year | Were the criteria for inclusion in the sample clearly defined? | Were the study subjects and the setting described in detail? | Were objective, standard criteria used for measurement of the condition? | Were confounding factors identified? | Were strategies to deal with confounding factors stated? | Were the outcomes measured in a valid and reliable way? | Was appropriate statistical analysis used? |
|-------------------|------|----------------------------------------------------------------|--------------------------------------------------------------|--------------------------------------------------------------------------|--------------------------------------|----------------------------------------------------------|---------------------------------------------------------|--------------------------------------------|
| Alikhani et al.   | 2018 | ✓                                                              | X                                                            | ✓                                                                        | ✓                                    | ✓                                                        | ✓                                                       | ✓                                          |
| Apajalahti et al. | 2003 | X                                                              | X                                                            | ✓                                                                        | X                                    | X                                                        | ✓                                                       | ✓                                          |
| Bildt et al.      | 2009 | ✓                                                              | ✓                                                            | ✓                                                                        | X                                    | X                                                        | ✓                                                       | ✓                                          |
| Cantarella et al. | 2006 | ✓                                                              | X                                                            | ✓                                                                        | X                                    | X                                                        | ✓                                                       | ✓                                          |
| Capelli et al.    | 2011 | ✓                                                              | X                                                            | ✓                                                                        | X                                    | X                                                        | ✓                                                       | ✓                                          |
| Grant et al.      | 2013 | ✓                                                              | X                                                            | ✓                                                                        | ✓                                    | ✓                                                        | ✓                                                       | ✓                                          |
| Ingman et al.     | 2005 | X                                                              | X                                                            | ✓                                                                        | X                                    | X                                                        | ✓                                                       | X                                          |
| Ribagin et al.    | 2012 | ✓                                                              | X                                                            | ✓                                                                        | X                                    | X                                                        | ✓                                                       | ✓                                          |
| Rody et al.       | 2014 | ✓                                                              | X                                                            | ✓                                                                        | X                                    | X                                                        | ✓                                                       | ✓                                          |
| Shirozaki et al.  | 2020 | ✓                                                              | X                                                            | ✓                                                                        | ✓                                    | X                                                        | ✓                                                       | ✓                                          |
| Surlin et al.     | 2014 | ✓                                                              | X                                                            | ✓                                                                        | X                                    | X                                                        | ✓                                                       | ✓                                          |
| Zhang et al.      | 2020 | ✓                                                              | X                                                            | ✓                                                                        | X                                    | X                                                        | ✓                                                       | ✓                                          |

✓ yes (lower bias risk); X no (higher bias risk)
